# Supplementary material for: Directional magnitude and intricacy of minimal repeat-mediated recombination across mouse and primates
Source: Research Square preprint supplement (doi:10.21203/rs.3.rs-7977169/v1), 2025-11-14
Supplement: Supplementary file 1 [file b58710f21673d002177ce50b.docx]

**Suppl. 1. Cross-species genome-wide counts of AT/TA and CG/GC D3U colonies, based on size range**

| **Genome Size***  **(Gb)** | **Total** | **≥100** | **10-99** | **3-9** | **D3U Colony Size** | **Species** |
| --- | --- | --- | --- | --- | --- | --- |
| 3.1 | 439172 | 1010 | 44963 | 393199 | **AT/TA** | **Human**** |
| 8957 | 0 | 699 | 8258 | **CG/GC** |
| 3.1 | 425933 | 1192 | 43288 | 381453 | **AT/TA** | **Chimpanzee** |
| 8717 | 0 | 715 | 8002 | **CG/GC** |
| 3 | 421009 | 1191 | 42289 | 377529 | **AT/TA** | **Gorilla** |
| 7699 | 0 | 579 | 7120 | **CG/GC** |
| 3 | 400053  6805 | 462  0 | 39331  283 | 360260  6523 | **AT/TA**  **CG/GC** | **Gibbon** |
| 2.9 | 414583 | 87 | 38854 | 375642 | **AT/TA** | **Macaque** |
| 7591 | 0 | 350 | 7241 | **CG/GC** |
| 2.9 | 420657 | 184 | 35954 | 384519 | **AT/TA** | **Marmoset** |
| 8397 | 0 | 645 | 7752 | **CG/GC** |
| 2.7 | 386489 | 27 | 31872 | 354590 | **AT/TA** | **Mouse** |
| 7524 | 0 | 417 | 7107 | **CG/GC** |

*****Genome sizes were annotated based on the following link: https://www.ncbi.nlm.nih.gov/datasets/genome/

******Human annotations are based on our previous study [8].
